# Supplementary material for: Methicillin-Resistant Staphylococcus aureus Adaptation to Human Keratinocytes
Source: PubMed Central journal article supplement — mBio. 2015 Apr 21;6(2):e00289-15. doi: 10.1128/mBio.00289-15 (PMC4453558; doi:10.1128/mbio.00289-15), 2015-04-21
Supplement: mbo002152281sf1.pdf [file mbo002152281sf1.pdf]

# Supplemental Figure 1

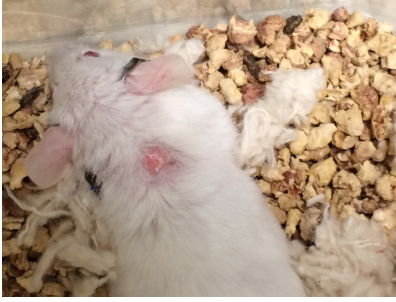

**Supplemental Figure 1. Scid:hu skin grafts in situ.** Image of SCID mouse with intact human graft. Visual inspection of the infected graft at 72 hours post inoculation. No obvious differences were appreciated in the gross appearance of the grafts exposed to PBS, WT USA300 or the *agr* null strain.
