# Supplementary material for: Methicillin-Resistant Staphylococcus aureus Adaptation to Human Keratinocytes
Source: PubMed Central journal article supplement — mBio. 2015 Apr 21;6(2):e00289-15. doi: 10.1128/mBio.00289-15 (PMC4453558; doi:10.1128/mbio.00289-15), 2015-04-21
Supplement: mbo002152281sf2.pdf [file mbo002152281sf2.pdf]

# Supplemental Figure 2

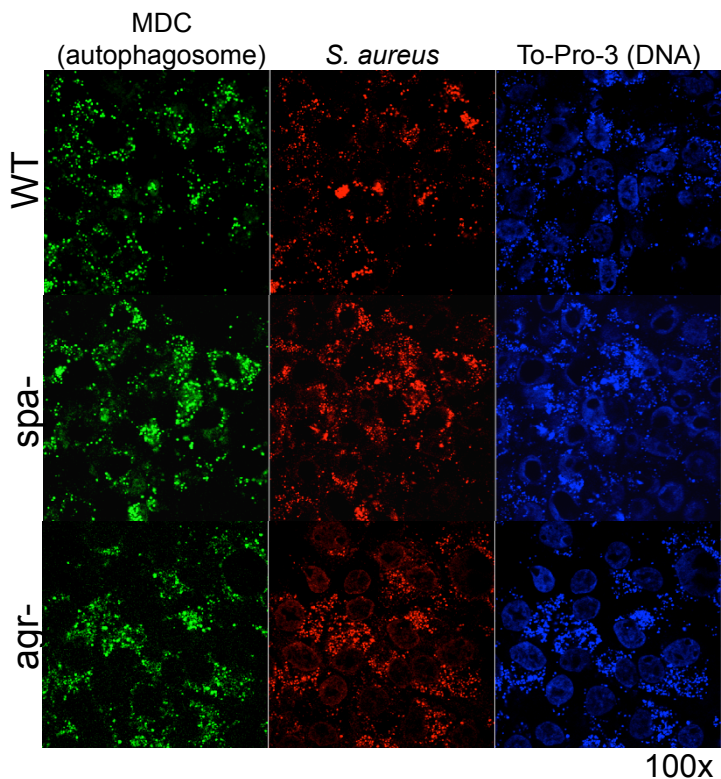

**Supplemental Figure 2. Visualization of USA300 and mutants with anti-*S.aureus* Ab.** A comparison of the anti- *S. aureus* staining achieved in HaCats exposed to WT, *spa* null or *agr* null mutant USA300; staining for MDC (green), *S. aureus* (red) or topo-3 (DNA) – blue, demonstrating roughly equivalent detection of *S. aureus* mutants that have very different amounts of surface protein A expression.
