# Supplementary material for: Methicillin-Resistant Staphylococcus aureus Adaptation to Human Keratinocytes
Source: PubMed Central journal article supplement — mBio. 2015 Apr 21;6(2):e00289-15. doi: 10.1128/mBio.00289-15 (PMC4453558; doi:10.1128/mbio.00289-15), 2015-04-21
Supplement: mbo002152281sf3.pdf [file mbo002152281sf3.pdf]

# Supplemental Figure 3

|                            | Hemolysis |     |     |     |
|----------------------------|-----------|-----|-----|-----|
|                            | 24h       |     | 72h |     |
|                            | % +       | % - | % + | % - |
| No inhibitor               | 100       | 0   | 100 | 0   |
| +Wortmannin                | 100       | 0   | 100 | 0   |
| +Gentamicin                | 100       | 0   | 100 | 0   |
| +DMSO                      | 100       | 0   | 100 | 0   |
| +DMSO<br>+Gentamicin       | 100       | 0   | 99  | 1   |
| +Wortmannin<br>+Gentamicin | 100       | 0   | 100 | 0   |

**Supplemental Figure 3.** Effects of wortmannin and gentamicin on the recovery of *agr*-like (non-hemolytic mutants). USA300 was grown in the presence of 10 µg/ml of wortmannin and/or 0.1 µg/ml of gentamicin for 24 or 72 hours; colonies plated onto LB media, and individual clones screened for hemolysis on sheep's blood plates.
